# Supplementary material for: Effect of Heme Oxygenase-1 on Melanoma Development in Mice—Role of Tumor-Infiltrating Immune Cells
Source: MDPI journal article supplement (doi:10.3390/antiox9121223), 2020-12-03
Supplement: s1 [file s1]

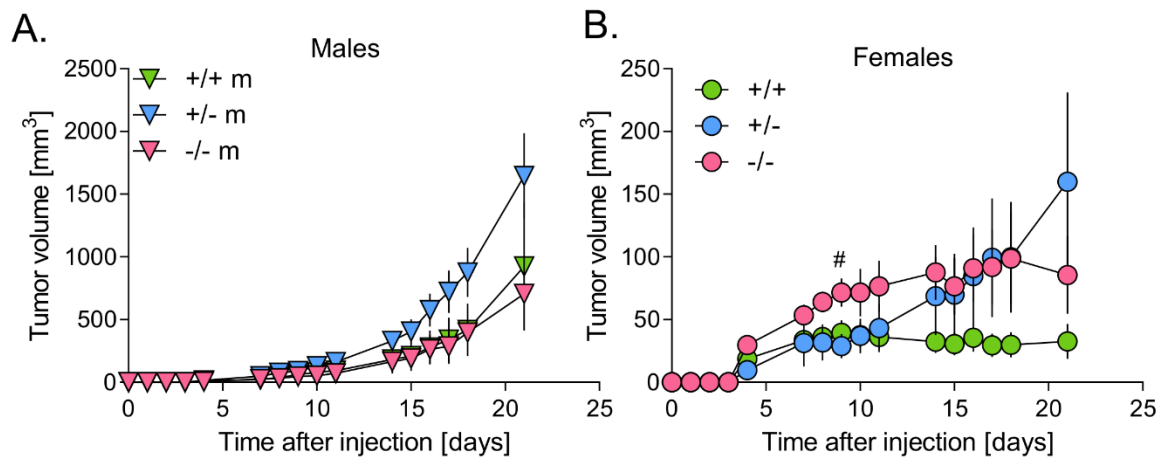

**Figure S1.** Effect of HO-1 expression in mice on primary tumor growth. Tumor volume in males (m) ( $N = 4-10$ ) (A) and females (f) ( $N = 4-10$ ) (B) of different HO-1 genotype: +/+, +/- or -/-. Each point represents mean  $\pm$  SE.
